# Supplementary material for: Cobalt-Doped Porous Carbon Nanosheets Derived from 2D Hypercrosslinked Polymer with CoN4 for High Performance Electrochemical Capacitors
Source: MDPI journal article supplement (doi:10.3390/polym10121339), 2018-12-04
Supplement: s1 [file s1]

# Cobalt-doped Porous Carbon Nanosheets Derived from 2D Hypercrosslinked Polymer with CoN<sub>4</sub> for High Performance Electrochemical Capacitors

Yuanhai Chen <sup>1</sup>, Fengru Liu <sup>1</sup>, Feng Qiu <sup>1,2,\*</sup>, Chenbao Lu <sup>3</sup>, Jialing Kang <sup>1</sup>, Doudou Zhao <sup>1</sup>, Sheng Han <sup>1,\*</sup> and Xiaodong Zhuang <sup>3,\*</sup>

<sup>1</sup> School of Chemical and Environmental Engineering, Shanghai Institute of Technology, Haiquan Road 100, Shanghai 201418, China; [yuanhai\\_charles@163.com](mailto:yuanhai_charles@163.com) (Y.C.); [lfu0719@163.com](mailto:lfu0719@163.com) (F.L.); [176061210@mail.sit.edu.cn](mailto:176061210@mail.sit.edu.cn) (J.K.); [176062121@mail.sit.edu.cn](mailto:176062121@mail.sit.edu.cn) (D.Z.)

<sup>2</sup> School of Chemistry, University of Bristol, Cantock's Close, Bristol BS8 1TS, UK

<sup>3</sup> School of Chemistry and Chemical Engineering, State Key Laboratory of Metal Matrix Composites, Shanghai Jiao Tong University, 800 Dongchuan Road, Shanghai 200240, China; [castle@sjtu.edu.cn](mailto:castle@sjtu.edu.cn)

\* Correspondence: [feng.qiu@bristol.ac.uk](mailto:feng.qiu@bristol.ac.uk) (F.Q.); [hansheng654321@sina.com](mailto:hansheng654321@sina.com) (S.H.); [zhuang@sjtu.edu.cn](mailto:zhuang@sjtu.edu.cn) (X.Z.)

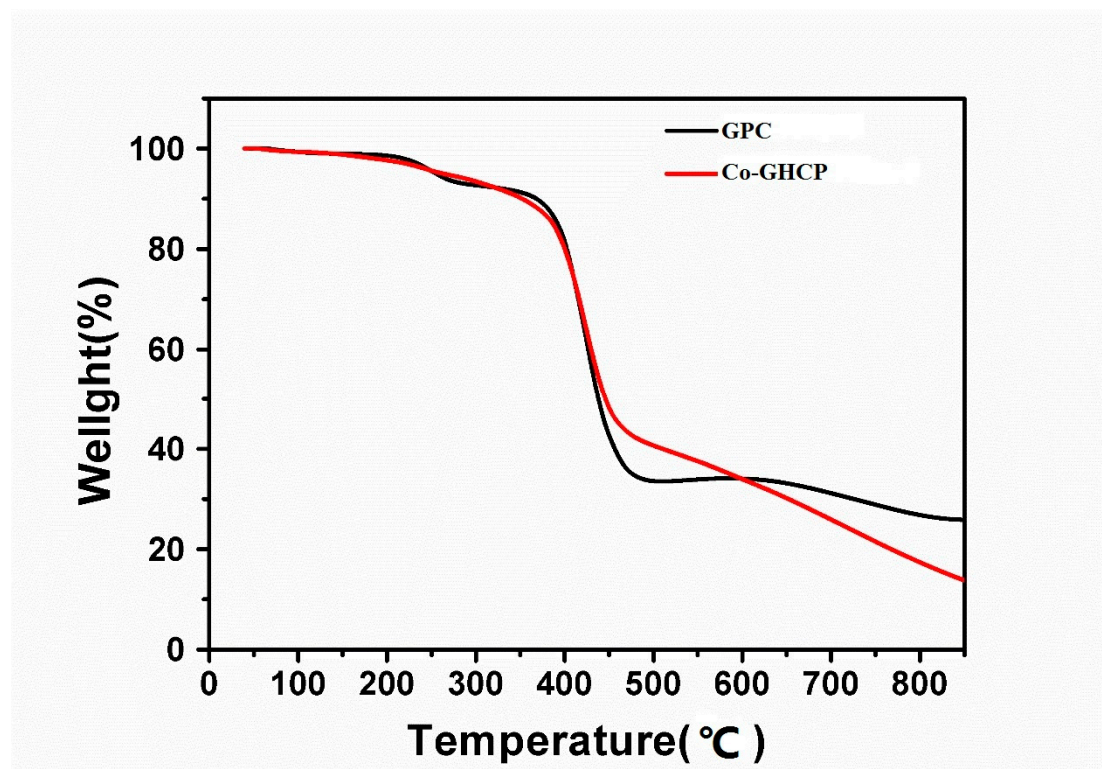

Figure S1. Thermo-gravimetric analysis (TGA) curve of Co-GHCP and GPC.

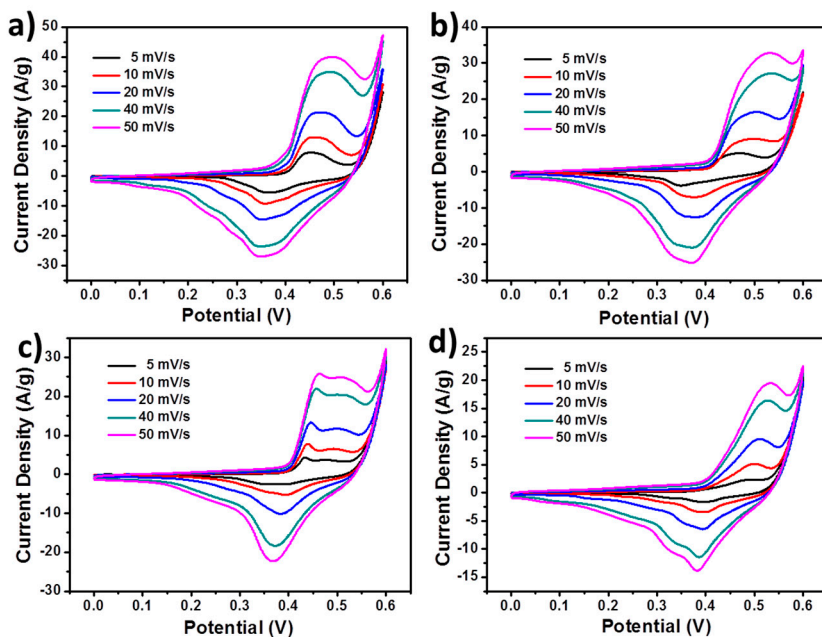

**Figure S2.** CV curves of (a) Co-GPC, (b) Co-GHCP, (c) GPC and (d) GHCP electrodes at various scan rates of 5, 10, 20, 40 and 50 mV s<sup>-1</sup> in the range of 0–0.6 V.

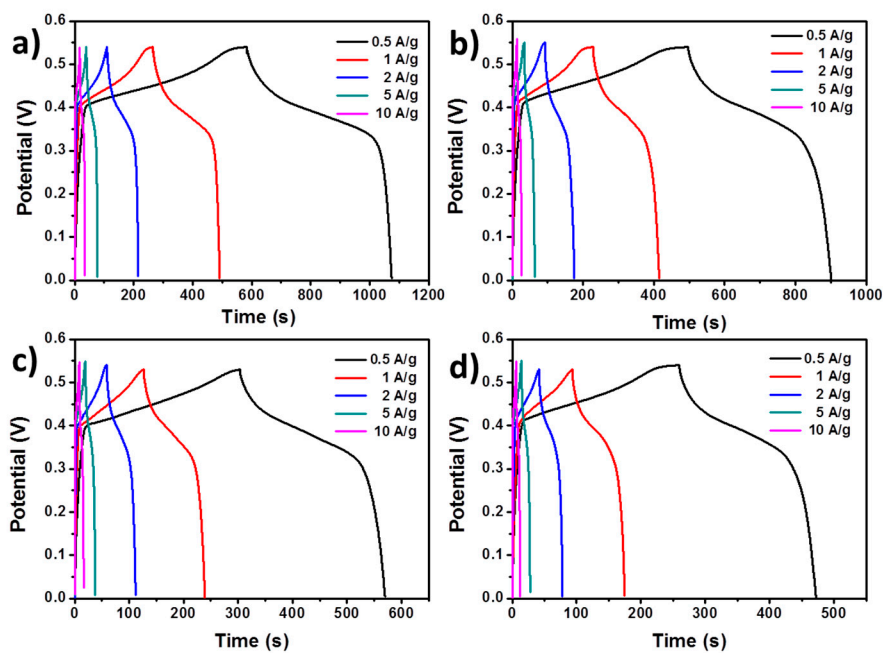

**Figure S3.** The galvanostatic charge-discharge curves of (a) Co-GPC, (b) Co-GHCP, (c) GPC and (d) GHCP electrodes at various specific currents of 0.5, 1, 2, 5 and 10 A g<sup>-1</sup> in the range of 0–0.54 V.

a)

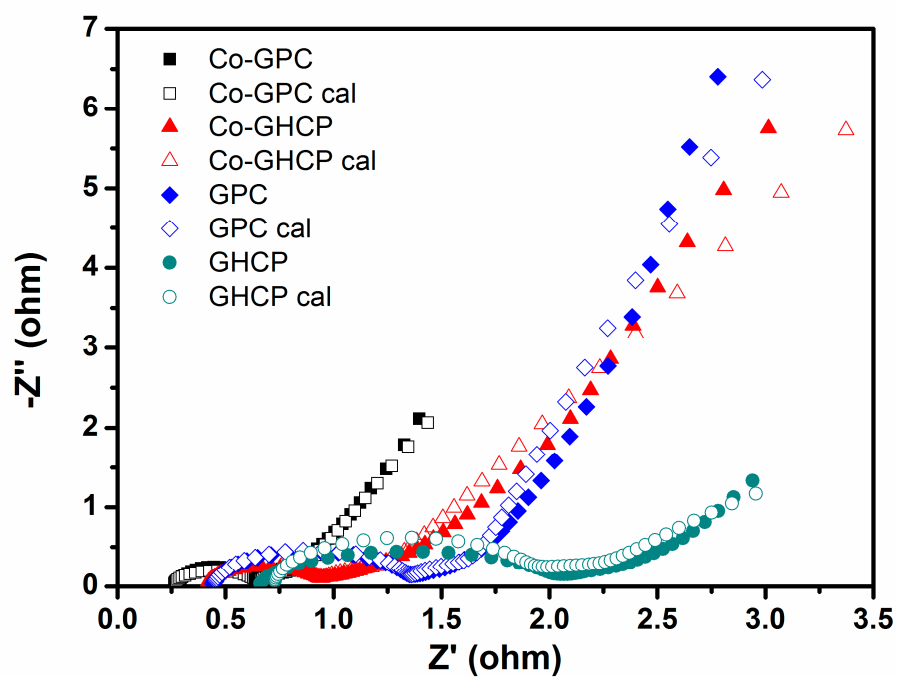

b)

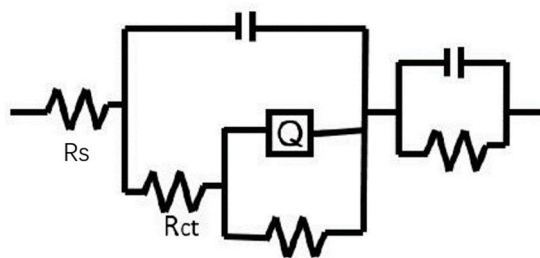

**Figure S4.** (a) The magnified EIS plot of the low frequency region (solid: experimental data; open: fitting data); (b) the equivalent circuit used for fitting of EIS data.

**Table S1.** The charge-transfer resistance values ( $R_{ct}$ ) and the solution resistance values ( $R_s$ ) of the samples as electrodes of supercapacitors in 1 M KOH.

| Sample  | $R_{ct}$ ( $\Omega$ ) | $R_s$ ( $\Omega$ ) |
|---------|-----------------------|--------------------|
| Co-GPC  | 0.28                  | 0.26               |
| Co-GHCP | 0.35                  | 0.42               |
| GPC     | 0.47                  | 0.45               |
| GHCP    | 0.38                  | 0.72               |

**Table S2.** Comparison of capacitance performance with other porphyrin-containing porous polymers or porous carbons.

| Sample                                                                                      | Electrolyte                            | Maximum $C_s$                                    | Rate performance                                   | Reference |
|---------------------------------------------------------------------------------------------|----------------------------------------|--------------------------------------------------|----------------------------------------------------|-----------|
| Co-doped porous carbons nanosheets from 2D hypercrosslinked polymer containing Co porphyrin | 1 M KOH                                | 455 F g <sup>-1</sup> at 0.5 A g <sup>-1</sup>   | $C_s$ retention of 69.2% at 10 A g <sup>-1</sup>   | This work |
|                                                                                             |                                        | 418 F g <sup>-1</sup> at 1.0 A g <sup>-1</sup>   | $C_s$ retention of 75.4% at 10 A g <sup>-1</sup>   |           |
| 2D CoSNC nanocomposites from porphyrin-based MOF                                            | 2 M KOH                                | 360.1 F g <sup>-1</sup> at 1.5 A g <sup>-1</sup> | $C_s$ retention of 74.3% at 15.0 A g <sup>-1</sup> | Ref. 1    |
| Microporous Poly(zincporphyrin)                                                             | 0.1 M Bu <sub>4</sub> NPF <sub>6</sub> | 142 F g <sup>-1</sup> at 5.0 A g <sup>-1</sup>   | $C_s$ retention of ~70% at 50 A g <sup>-1</sup>    | Ref. 2    |
| Cu-porphyrin@PPy nanocomposites                                                             | 0.5 M H <sub>2</sub> SO <sub>4</sub>   | ~496 F g <sup>-1</sup> at 1.0 A g <sup>-1</sup>  | $C_s$ retention of ~57% at 10 A g <sup>-1</sup>    | Ref. 3    |
| Fe-doped porous carbon from Fe porphyrin-based microporous conjugated polymer               | 1 M H <sub>2</sub> SO <sub>4</sub>     | ~182 F g <sup>-1</sup> at 1.0 A g <sup>-1</sup>  | $C_s$ retention of ~67 % at 10 A g <sup>-1</sup>   | Ref. 4    |
| Nanoporous carbons from porphyrin-based MOF                                                 | 1 M H <sub>2</sub> SO <sub>4</sub>     | 425 F g <sup>-1</sup> at 2.0 A g <sup>-1</sup>   | $C_s$ retention of ~57.4 % at 10 A g <sup>-1</sup> | Ref. 5    |
| Fe-doped porous carbons from Fe porphyrin-based coordination polymers                       | -                                      | 380 F g <sup>-1</sup> at 1.0 A g <sup>-1</sup>   | $C_s$ retention of ~52 % at 10 A g <sup>-1</sup>   | Ref. 6    |
| Co-doped porous carbons from Co porphyrin-based coordination polymers                       | -                                      | 100 F g <sup>-1</sup> at 1.0 A g <sup>-1</sup>   | $C_s$ retention of ~35 % at 10 A g <sup>-1</sup>   |           |

## Reference

1. F. Cao, M. Zhao, Y. Yu, B. Chen, Y. Huang, J. Yang, X. Cao, Q. Lu, X. Zhang, Z. Zhang, C. Tan, H. Zhang, Synthesis of Two-Dimensional CoS<sub>1.097</sub>/Nitrogen-Doped Carbon Nanocomposites Using Metal–Organic Framework Nanosheets as Precursors for Supercapacitor Application, *Journal of the American Chemical Society*, 138 (2016) 6924–6927.
2. H. Zhang, Y. Zhang, C. Gu, Y. Ma, Electropolymerized Conjugated Microporous Poly(zinc-porphyrin) Films as Potential Electrode Materials in Supercapacitors, *Advanced Energy Materials*, 5 (2015) 1402175.
3. H. Yao, F. Zhang, G. Zhang, H. Luo, L. Liu, M. Shen, Y. Yang, A novel two-dimensional coordination polymer-polypyrrole hybrid material as a high-performance electrode for flexible supercapacitor, *Chemical Engineering Journal*, 334 (2018) 2547–2557.
4. A.C. Lim, H.S. Jadhav, J.G. Seo, Electron transport shuttle mechanism via an Fe–N–C bond derived from a conjugated microporous polymer for a supercapacitor, *Dalton Transactions*, 47 (2018) 852–858.
5. T.H. Chang, C. Young, M.H. Lee, R.R. Salunkhe, S.M. Alshehri, T. Ahamad, M.T. Islam, K.C.W. Wu, M.S.A. Hossain, Y. Yamauchi, K.C. Ho, Synthesis of MOF-525 Derived Nanoporous Carbons with Different Particle Sizes for Supercapacitor Application, *Chemistry–An Asian Journal*, 12 (2017) 2857–2862.
6. S. Jin, J.P. Hill, Q. Ji, L.K. Shrestha, K. Ariga, Supercapacitive hybrid materials from the thermolysis of porous coordination nanorods based on a catechol porphyrin, *Journal of Materials Chemistry A*, 4 (2016) 5737–5744.
